# 1 A single-cell based precision medicine approach using glioblastoma patient- 2 specific models

3  
4 James H. Park<sup>1</sup>†, Abdullah H. Feroze<sup>2</sup>†, Samuel N. Emerson<sup>2</sup>†, Anca B. Mihalas<sup>2,3</sup>, C. Dirk  
5 Keene<sup>4</sup>, Patrick J. Cimino<sup>4</sup>, Adrian Lopez Garcia de Lomana<sup>5</sup>, Kavya Kannan<sup>1</sup>, Wei-Ju Wu<sup>1</sup>,  
6 Serdar Turkarslan<sup>1</sup>, Nitin S. Baliga<sup>1,6</sup>†\*, Anoop P. Patel<sup>2,3,7</sup>†\*

7  
8 <sup>1</sup> Institute for Systems Biology, Seattle, WA.

9 <sup>2</sup> Department of Neurological Surgery, University of Washington, Seattle, WA.

10 <sup>3</sup> Human Biology Division, Fred Hutchinson Cancer Research Center, Seattle, WA.

11 <sup>4</sup> Department of Pathology, University of Washington, Seattle, WA.

12 <sup>5</sup> Center for Systems Biology, University of Iceland, Reykjavik, Iceland.

13 <sup>6</sup> Departments of Microbiology, Biology, and Molecular Engineering Sciences, University of  
14 Washington, Seattle, WA.

15 <sup>7</sup> Brotman-Baty Institute for Precision Medicine, University of Washington, Seattle, WA.

16  
17 † These authors contributed equally.

18 \* Correspondence: [nitin.baliga@isbscience.org](mailto:nitin.baliga@isbscience.org), [apatell@uw.edu](mailto:apatell@uw.edu)

19  
20 **Summary:** Inference of mechanistic drivers of therapy-induced evolution of glioblastoma at single  
21 cell resolution using RNA-seq and ATAC-seq from patient samples and model systems  
22 undergoing standard-of-care treatment informs strategy for identification of tumor evolutionary  
23 trajectories and possible cell state-directed therapeutics.

24  
25 **Abstract:** Glioblastoma (GBM) is a heterogeneous tumor made up of cell states that evolve over  
26 time. Here, we modeled tumor evolutionary trajectories during standard-of-care treatment using  
27 multimodal single-cell analysis of a primary tumor sample, corresponding mouse xenografts  
28 subjected to standard of care therapy, and recurrent tumor at autopsy. We mined the multimodal  
29 data with single cell SYstems Genetics Network AnaLysis (scSYGNAL) to identify a network of  
30 52 regulators that mediate treatment-induced shifts in xenograft tumor-cell states that were also  
31 reflected in recurrence. By integrating scSYGNAL-derived regulatory network information with  
32 transcription factor accessibility deviations derived from single-cell ATAC-seq data, we  
33 developed consensus networks that regulate subpopulations of primary and recurrent tumor cells.  
34 Finally, by matching targeted therapies to active regulatory networks underlying tumor  
35 evolutionary trajectories, we provide a framework for applying single-cell-based precision  
36 medicine approaches in a concurrent, neo-adjuvant, or recurrent setting.

## 37 **Introduction.**

38

39 GBM is a highly lethal malignancy of the brain that is refractory to standard-of-care (SOC)  
40 therapy, which consists of surgery, radiation (XRT), and chemotherapy with the DNA-alkylating  
41 agent, temozolomide (TMZ) (1–3). Despite aggressive treatment, median survival is only 14-17  
42 months. Previous studies have shown that GBM tumors are made up of a complex ecosystem of  
43 normal cell types and malignant tumor cell states (4–6). Given this intratumoral heterogeneity, a  
44 multimodal systems biology approach is well-suited to characterize and uncover the mechanistic  
45 drivers of genetic and epigenetic programs that distinguish cell states within the tumor. Moreover,  
46 non-genetic, treatment-induced shifts in cell state occur along trajectories that are as yet unknown.

47

48 Here, we develop a framework to model and characterize non-genetic cell states that comprise a  
49 GBM tumor at the outset of the disease and during treatment-induced evolution (Fig. 1A). This  
50 framework, applied to an individual patient, is based on single-cell multi-omic analysis (scRNA-  
51 seq, scATAC-seq) of the initial patient biopsy, a time series of SOC-treated patient-derived  
52 xenografts (scRNA-seq), and of the recurrent tumor treated with XRT at autopsy (scRNA-seq,  
53 scATAC-seq). From our analysis, we identified multiple mechanistic drivers of treatment-induced  
54 transitions in the epigenetic states of tumor cells (6–8). As proof of concept, we then identified  
55 potential therapeutics that could target specific cell states during various stages of tumor evolution.  
56 This work collectively provides a framework to model tumor evolution during treatment and  
57 implement systems biology approach-based single-cell analysis for the rational design of precision  
58 therapeutic regimens.

59

## 60 **Results.**

61

### 62 *scRNA-seq and scATAC-seq analysis reveals multiple transcriptional network states in* 63 *glioblastoma*

64

65 We first aimed to create a reference landscape of cell types and tumor cell states by integrating  
66 both scRNA-seq and scATAC-seq data into the same latent space using previously established  
67 methods (Fig. 1B) (9). We then identified marker genes for each major cluster and manually  
68 curated cell-type annotations (Fig. 1C, 1D). Based on the curated cell-type annotation, we analyzed  
69 a total of 7,723 single cells from the primary tumor, which consisted of 358 (4.6%)  
70 oligodendrocytes, 1,169 (15.1%) microglia, 134 (4.2%) pericytes/endothelial cells, 305 (3.9%)  
71 excitatory neurons, 568 (7.4%) inhibitory neurons, and 103 (1.3%) astrocytes. Further, we  
72 identified 4,924 tumor cells, which made up 63.7% of single cells collected from the primary  
73 sample, based on a characteristic gain of chromosome 7 and loss of chromosome 10 in GBM (10)  
74 (Fig. 1B, 1C, S1). The identities of subpopulations were confirmed by statistically significant  
75 differential expression of marker genes including *SOX2*, *PTPRC*, *MBP*, *RBF3*, *VWF*, and  
76 *PTPRZ1* for various cell subtypes (Table S1).

77

78 To identify regulator networks in scRNA-seq data, we adapted the Systems Genetics Network  
79 AnaLysis (SYGNAL) platform (11) to analyze the scRNA-seq profiles (scSYGNAL) and identify  
80 distinct epigenetic programs that were differentially active and distinguished subpopulations of  
81 tumor cells in the primary tumor. Briefly, using biclustering of scRNA-seq data, we inferred  
82 regulons (i.e., sets of genes sharing similar expression patterns and putatively co-regulated by the  
83 same transcription factor (TF) or miRNA across a sub-population of single cells). Our analysis  
84 revealed the mechanistic co-regulation of 809 genes across 160 regulons by at least 65 TFs and  
85 141 miRNAs. We then used the Mining for Node Edge Relationships (MINER) algorithm (12) to  
86 identify a subset of 93 significant regulons that included 52 unique TFs regulating 454 target genes  
87 (Methods, Tables S2 and S3). These 93 regulons were further clustered into 5 metaregulon groups  
88 (i.e., transcriptional programs) with distinct regulon activity profiles across the 3,130 tumor cells  
89 analyzed with scRNA-seq (Fig. 1D, E). Moreover, functional enrichment analysis (13), revealed  
90 distinct biological processes and molecular functions associated with these programs (Fig. 1D,  
91 Tables S4-S8), the amalgamation of which we defined as a transcriptional network state.

92

93 ***scSYGNAL identifies a network of regulators mediating treatment-induced shifts in xenograft***  
94 ***tumor-cell states also reflected in recurrent disease***

95

96 Based on these transcriptional network states, we clustered the tumor cells into 5 groups of cells  
97 sharing similar network states, with each group exhibiting upregulated activity of specific  
98 programs. For example, the SG-4 subpopulation expressed increased activity in program 1,  
99 enriched for hypoxia-associated genes like *VEGFA*, *PLOD2*, and *PDK1*. In addition, the SG-4  
100 subpopulation exhibited decreased activity in cell-cycle-related regulons (transcriptional program  
101 4), suggesting that this group is comprised mainly of non-proliferative cells. Further, statistical  
102 analysis revealed an over-enrichment of non-proliferating cells in SG-4 (Methods, Table S9) (14).  
103 The SG-1 subpopulation exhibited high activity for program 2, which includes an enrichment of  
104 angiogenesis-related genes, suggesting that this subpopulation may be involved in tumor  
105 neovascularization. The SG-3 group consists of tumor cells that expressed increased activity in  
106 regulons associated with the G2M checkpoint and E2F targets, mirroring gene expression behavior  
107 of proliferative GBM cells (15, 16). Similarly, proliferating cells were over-enriched in the SG-3  
108 population (Table S9). Conversely, the SG-5 subpopulation did not exhibit distinct upregulation  
109 of any one distinct program. Rather, these cells expressed faint signatures of multiple regulons  
110 across multiple programs. It is possible that this subpopulation represents tumor cells transitioning  
111 between states or cells that are primed for expression of a variety of programs.

112

113 To place these results into a broader context, we compared the 52 unique TFs for the 93 significant  
114 regulons to those TFs deemed to be essential for GBM-specific proliferation via a genome-wide  
115 CRISPR-Cas9 screen (17). Of the 52 unique TFs identified in the MINER analysis of the scRNA-  
116 seq data, 17 (33%,  $p = 0.072$ ) overlapped with the TFs essential for GBM tumor cell proliferation,

117 indicating that our single-cell based network analysis identified relevant GBM-specific regulatory  
118 mechanisms (Table S10).

119  
120 In an independent and orthogonal approach, we also analyzed scATAC-seq data to identify TF  
121 motifs that were enriched in differentially accessible regions of the genome across the tumor cell  
122 population. Using the ArchR package and chromVAR method (18, 19), we identified 103 TFs as  
123 positive regulators, i.e., those TFs having significant motif deviation scores that correlate with  
124 their inferred gene expression values (Fig 1F). By comparing the set of TFs identified from ArchR  
125 analysis of scATAC-seq data and the set from the SYGNAL/MINER analysis of scRNA-seq data,  
126 we identified a consensus set of 7 TFs (*AR*, *TEAD1*, *RUNX1*, *RORA*, *EBF1*, *ZEB1*, and *TCF4*).  
127 Notably, only a subset of these genes showed significant differential expression across the tumor  
128 population when examining their expression levels in transcriptional data, implying that many of  
129 these regulators would not have been identified using standard scRNA-seq data analyses, such as  
130 shared nearest neighbor-based cluster identification (Fig. S2) and subsequent differential  
131 expression (Table S11). Interestingly, this set of TFs has potentially important roles in tumor  
132 biology. Extensive data implicate the role of *TEAD1* in YAP/Hippo signaling in gliomagenesis  
133 and other neoplastic processes (20–23). *TCF4* is a mediator of Wnt/ $\beta$ -catenin signaling and  
134 correlates with glioma progression via effects on *AKT2* (24). Similarly, *ZEB1* is a key regulator  
135 in epithelial-to-mesenchymal (proneural-to-mesenchymal) transition and associated  
136 chemoresistance mechanisms (25, 26). *AR* signaling has been shown to be active in GBM cells *in*  
137 *vitro* and may relate to radiation resistance (27, 28). Based on our analysis of integrated  
138 transcriptional and chromatin accessibility data, we conclude that these TFs likely play key roles  
139 in the regulation of tumor cell states in the primary tumor.

140  
141 Having assessed the regulatory networks of cell states within the primary tumor, we then sought  
142 to understand how tumor cell states change over time. Tumors evolve due to both intrinsic  
143 pressures (i.e., acquired mutations, tumor-microenvironment interactions) and extrinsic pressures  
144 (therapeutic intervention). In particular, we were interested to see whether treatment-induced  
145 evolution of tumor cell-states resulted in selection of preexisting states, induction of novel states,  
146 or a combination of both. To address these questions, we modeled treatment-induced cell-state  
147 changes by applying SOC therapy (XRT/TMZ) to a cohort of patient-derived xenografts (PDX)  
148 created from the patient's tumor. Tumor cells isolated directly from the patient were injected  
149 orthotopically into immunocompromised mice without any intervening culture. We obtained  
150 scRNA-seq data on samples collected from SOC-treated xenografts at 24 and 72 hours after  
151 completion of therapy and corresponding untreated controls. We then performed batch integration  
152 and dimensionality reduction of the scRNA-seq data to visualize, identify, and compare cell states  
153 of xenograft samples to those of the corresponding primary tumor (Fig 2A). Interestingly, ~33%  
154 of the primary tumor cells in the UMAP embedding had a nearest neighbor originating from an  
155 untreated PDX mouse (Supplemental Fig. S3). Closer examination of the primary tumor cells  
156 having an untreated-PDX cell as a nearest neighbor revealed that these tumor cells represented all

157 SG groups, suggesting that the PDX models were able to reproduce the majority of the cell states  
158 observed in the primary tumor. Similarly, statistical analysis of tumor cell sources (i.e., primary  
159 vs. treated PDX) within clusters identified via shared nearest neighbor (SNN) modularity  
160 optimization (29) revealed that several SNN clusters were enriched for tumor cells from both the  
161 primary tumor and PDX mice (Fig. S2). Taken together, these results support the idea that the  
162 transcriptional network states underlying xenograft tumor cells recapitulate those states present in  
163 the primary tumor.

164  
165 In addition, our framework enabled us to identify patterns of regulon/transcriptional program  
166 activities that were reflected in the recurrent tumor. We first compared scRNA-seq profiles of  
167 tumor cells identified from the recurrent tumor specimen collected at autopsy (Fig. S4) to those of  
168 the primary tumor and PDX samples. Specifically, we projected the recurrent tumor cells into a  
169 low dimensional space (Fig. S5) defined by the primary and PDX tumor cells and found that a  
170 majority of the recurrent tumor cells projected onto primary tumor and PDX cells in SNN cluster  
171 1 (Fig. S5). Concomitantly, we used single sample gene set enrichment analysis (ssGSEA) to test  
172 for the enrichment of regulons and transcriptional programs within the autopsy tumor cells. Indeed,  
173 a majority of autopsy tumor cells were significantly enriched for transcriptional programs that  
174 were active in late-stage post-treatment PDX samples (Fig. 2D) and shared similar transcriptomic  
175 states and programmatic activity to those tumor cells as well (Fig. S6), which further support the  
176 utility of PDX models to characterize treatment-induced evolution of tumor cell states.

177  
178 We examined the distribution of cells from different timepoints across the co-embedded UMAP  
179 space and identified four broad partitions in the data (Fig. 2B). The “early” (pre-treatment) stage  
180 was heavily enriched for cells from the primary tumor and untreated PDX models (Fig. S7). The  
181 “immediate post-treatment” stage (IPT) was enriched for the 24-hour post-treatment timepoint.  
182 The “late post-treatment” (LPT) stage was divided into two subpopulations (A and B) that were  
183 enriched for the 72-hour post treatment timepoint. Finally, the “recurrent” timepoint (REC)  
184 included cells from the recurrent, autopsy specimen and 72-hour post treatment PDX samples.

185  
186 ***scSYGNAL/Open Targets platform analysis allows for identification of possible drug targets for***  
187 ***induced, selected, and recurrent cell states***

188  
189 Understanding tumor evolutionary trajectories could have important implications for therapeutic  
190 strategy. Therefore, we sought to identify potential therapeutics that putatively target TF regulators  
191 and/or their associated regulon gene members exhibiting positive activity across tumor cell states  
192 within specific timeframes (Table S12) using the Open Targets platform (30). Briefly, the Open  
193 Targets platform provides an extensive curated database that enables users to identify drug-target  
194 genes/proteins pairings. Using this platform, we identified a set of drugs that target various  
195 regulators and/or downstream target genes associated with the regulons/programs identified in our  
196 analysis (Table S13). In addition to this, we curated the literature to identify pathways and drugs

197 that were relevant to TFs in each of the trajectories. We then aligned these drug mappings with  
198 specific patterns of regulator activity over the timespan of our disease-modeling framework.

199

200 Using this framework, we characterized dynamics over the time course of treatment and recurrence  
201 with the aim of identifying potential therapeutic vulnerabilities and optimal treatment timeframes  
202 (i.e., regulon and cell state changes). Several dynamic patterns of cell state and specific regulon  
203 activity occur during the process of tumor evolution and offer an additional dimension along which  
204 to define treatment-related state and potentially inform treatment strategies. The first evolutionary  
205 path of a regulon to consider is one that is active early in the disease but decreases in activity over  
206 time. Our modeling system allows us to identify regulators that are represented only the in early  
207 (pre-treatment) tumor specimen. Of the consensus TFs identified from integrated analysis, *TEAD1*  
208 and *TCF4* demonstrated decreased activity after SOC (Fig. 2C), suggesting that SOC effectively  
209 depleted and selected against those regulons.

210

211 Another treatment-related state observed was the “selected” state, characterized by behavior in  
212 which regulons increase activity over the course of treatment. Thus, tumor cells within the primary  
213 tumor expressing these regulons in the primary tumor may have a relative advantage during  
214 treatment, which is supported by the subsequent increased activity and representation in cells over  
215 time. One example of a “selected” regulator is the transcription factor *PRRX1*, which had relatively  
216 low activity in the early stages but increased activity over the course of the disease (Fig. 2C).  
217 *PRRX1* has previously been associated with regulation of mesenchymal gene expression programs  
218 in cancer via activation of TGF- $\beta$  signaling (31). This would suggest that small molecule inhibitors  
219 of the TGF- $\beta$  signaling pathway such as galunisertib should have effects on this particular regulon.  
220 Because this regulon’s activity increases over the course of treatment, our data and analysis would  
221 suggest that TGF- $\beta$  inhibitors (i.e., galunisertib) should be combined with XRT/TMZ concurrently  
222 or could serve as an effective adjuvant therapeutic after SOC treatment.

223

224 In contrast, “induced” states are characterized by regulons having low activity in the early stages  
225 of the disease but become prevalent over time. *IKZF2*, a chromatin remodeler that has been shown  
226 to regulate chromatin accessibility in leukemia, was less active in the primary tumor cells but  
227 became active during treatment and remained active at recurrence (Fig. 2C). Open Targets analysis  
228 identified CDK4/6 inhibitors as possible therapeutics targeting this regulon through activity of  
229 *IKZF2* on CDK4 (Table S12). Once again, given the importance of these states during treatment,  
230 our analysis would suggest that therapies targeting this regulon are more likely to be effective in  
231 the concurrent and adjuvant setting. Induced states could also be identified that were unique to  
232 later stages. A regulatory network driven by *NR3C1* was independently identified from  
233 scSYGNAL analysis as a regulator of the recurrent stage and had one of the highest deviation  
234 scores from analysis of the ATAC-seq data (Fig. 2E). This would suggest that a regulatory network  
235 governed by *NR3C1* expression was particularly important at the time of tumor recurrence. Open  
236 Targets analysis identified corticosteroids, including dexamethasone, as possible modulators of

237 this regulon. The activity of this regulon at the time of recurrence may be a reflection of  
238 dexamethasone administration at later stages of the disease. Moreover, the post-treatment  
239 upregulation of NR3C2, suggests that agonists such as eplerenone and spironolactone targeting  
240 this mineralocorticoid receptor could potentially be used in an adjuvant setting following SOC.  
241 Interestingly, previous studies have shown spironolactone to have anticancer properties in  
242 prostate and breast cancer via regulation of DNA damage response (32).

243  
244 ***scSYGNAL allows for identification of transient therapy-induced evolutionary cell states and***  
245 ***associated regulons***

246  
247 Finally, a key strength of this modeling framework was the ability to identify regulons and cell  
248 states that are only transiently-induced during treatment but do not persist beyond the immediate  
249 treatment or late post-treatment stages. These cell states are presumably missed by most clinical  
250 specimen analysis because they exist transiently during a time-period when sampling rarely occurs.  
251 In our framework, transient states are represented most clearly by the immediate post-treatment  
252 (IPT) and late post-treatment (LPT) timepoints. We identified *ZIC1* as being predominantly active  
253 during this part of the overall tumor evolutionary trajectory (Fig. 2C). *ZIC1* is a zinc finger TF that  
254 has been shown to regulate forebrain development by maintaining neural precursor cells in an  
255 undifferentiated state (33). The regulon for *ZIC1* includes several genes important in glioma  
256 stemness including *ADM* and *VGF*. Its activation during treatment suggests that targeting this  
257 regulatory network in the adjuvant setting may effectively block a pathway to resistance.

258  
259 Another set of cell states and associated regulons that showed transient induction were regulated  
260 by *SOX5* (Fig. 2C), which has been shown to have mixed roles in glioblastoma but is an important  
261 driver of TGF- $\beta$  mediated epithelial-to-mesenchymal transition and invasive phenotypes in a  
262 variety of other cancers (34–36). Several regulons driven by *SOX5* were activated throughout the  
263 treatment process, including regulons specific to “immediate post-treatment” and “late post-  
264 treatment” stages. In addition to the TGF- $\beta$  pathway, Open Targets analysis also identified *TTK*, a  
265 dual specificity protein kinase as a member of the *SOX5* regulon. While there are no TTK inhibitors  
266 currently approved, there are several in development for solid cancers (37). Transient states that  
267 are governed by TFs such as *ZIC1* and *SOX5* represent appealing targets for concurrent therapies  
268 that could be trialed in conjunction with SOC.

269  
270 When assessing potential targets, a critical point to consider is that multiple regulons may be  
271 controlled by a single master regulator yet have activities that are contextually disparate. One such  
272 example involves the androgen receptor (*AR*), which putatively regulates three regulons (Table S2,  
273 Fig. S8). Regulon 15 demonstrated “selected against” behavior, suggesting that SOC was effective  
274 at suppressing its activity. Regulon 20 demonstrated “transient” behavior, suggesting that it may  
275 have some activity during SOC and may relate to resistance to radiation, which has been suggested  
276 previously (38). Finally, regulon 17 demonstrated “induced” behavior and had high activity at

277 recurrence. Activity of the AR regulon raises the possibility of androgen targeting therapies as  
278 possible treatments for GBM in a variety of contexts, including in concurrent with SOC therapy  
279 or in the adjuvant and salvage settings. Determination of whether this is a gender-specific effect  
280 (this patient was male) and whether *AR* activity is generalizable across patients will require  
281 analysis of additional samples.

282  
283 Furthermore, to increase the number of potential regulatory targets, it is also important to consider  
284 regulators that were identified uniquely by either transcriptional or epigenetic analysis. For  
285 example, analysis of scATAC-seq data from the recurrent sample identified several TFs with  
286 highly significant motif deviations, mostly notably *RFX3* and *RFX7* (Fig. 2E). These two TFs play  
287 roles in ciliogenesis in the central nervous system, which has been identified as an important  
288 pathway in regulating glioblastoma growth and resistance to therapy (39). Importantly, these two  
289 regulators were not identified in transcriptomic network analysis and would have otherwise been  
290 missed had our analysis utilized scRNA-seq alone, highlighting the importance of multi-omic  
291 information to identify both shared and unique regulatory networks in different contexts. While  
292 there are no small molecules that currently target these regulators, they may be appealing  
293 candidates for nonconventional or novel directed therapies including CRISPR-Cas9 or antisense  
294 RNA-based approaches in the recurrent or salvage therapy setting.

295

## 296 **Discussion.**

297

298 In summary, tumors are complex ecosystems of cell types and various tumor-cell subpopulations  
299 interacting with one another in a complex microenvironment, mandating the use of single cell  
300 methods to understand tumor biology more precisely. In this study, we characterized a patient's  
301 tumor, analyzing the transcriptomic and epigenetic state of tumor cells and corresponding  
302 microenvironment. By integrating multimodal single-cell analysis and *a priori* knowledge of  
303 regulatory relationships, enabled by SYGNAL and MINER analysis, we identified regulon-based  
304 tumor-cell subpopulations and underlying regulatory relationships, inferred from scRNA-seq data  
305 and corroborated by scATAC-seq analysis. Our modeling/monitoring framework demonstrated  
306 the ability to capture spatiotemporal tumor heterogeneity and underlying mechanistic drivers  
307 within regulatory networks based upon both transcriptomic and epigenetic states. Furthermore,  
308 PDX modeling revealed multiple potential trajectories of tumor cell progression in response to  
309 chemoradiotherapy and in the setting of recurrence.

310

311 Our proof-of-concept work herein provides the basis for the development of a modeling and  
312 analytical system that enables single-cell characterization of an individual patient's tumor and  
313 inferred therapeutic vulnerabilities (Fig 3). Although further validation is required, in the form of  
314 *in vivo* studies of these putative druggable targets, our preliminary analysis and results suggest that  
315 systems biology techniques can be used to infer and predict therapeutic vulnerabilities that are  
316 either selected or induced during SOC treatment. Ultimately, the information gathered from such



317 systematic modeling and analysis of individual tumors may inform clinical treatment in a more  
318 targeted manner and enable a rational, tailored precision medicine that accounts for intratumoral  
319 cell heterogeneity.

320

321

## 322 **Materials & Methods.**

323

### 324 ***Tumor acquisition***

325 Based upon institutional review board (IRB)-approved protocols (protocol #STUDY00002162),  
326 intraoperative tumor specimens from adult patients who voluntarily consented to donation to the  
327 institutional tumor bank were collected in cryogenic vials (Corning; Corning, NY) and  
328 immediately snap frozen in liquid nitrogen. All patient specimens were anonymized prior to  
329 processing. Tumor pathology and diagnosis was confirmed by a neuropathologist as WHO grade  
330 IV glioblastoma, IDH-wild type. Specimen was then subsequently stored in -80 C freezers for  
331 further experimentation. Autopsy tissue was collected after informed consent with a waiver from  
332 the University of Washington IRB with a post-mortem interval of approximately 8.75 hours.  
333 Tissue was snap frozen in liquid-nitrogen cooled isopentane. Tumor regions were sampled based  
334 on gross examination of brain sections and processed as outlined below.

335

### 336 ***Tissue processing***

337 Frozen tissue was processed to nuclei using the Frankenstein protocol from Protocols.io. Briefly,  
338 snap frozen glioblastoma tissue was thawed on ice and minced sharply into <1 mm portions. 500  
339  $\mu$ l chilled Nuclei EZ Lysis Buffer (Millipore Sigma, NUC-101 #N3408) was added and tissue was  
340 homogenized 10-20 times in a Dounce homogenizer. The homogenate was transferred to a 1.5 ml  
341 Eppendorf tube and 1 mL chilled Nuclei EZ Lysis Buffer was added. The homogenate was mixed  
342 gently with a wide bore pipette and incubated for 5 minutes on ice. The homogenate was then  
343 filtered through a 70- $\mu$ m mesh strainer and centrifuged at 500g for 5 minutes at 4°C. Supernatant  
344 was removed and nuclei were resuspended in 1.5 mL Nuclei EZ lysis buffer and incubated for 5  
345 minutes on ice. Nuclei were centrifuged at 500g for 5 min at 4°C. After carefully removing the  
346 supernatant, nuclei were washed in wash buffer (1x PBS, 1.0% BSA, 0.2 U/ $\mu$ l RNase inhibitor).  
347 Nuclei were then centrifuged and resuspended in 1.4 ml wash buffer for two additional washes.  
348 Nuclei were then filtered through a 40  $\mu$ m mesh strainer. Intact nuclei were counted after  
349 counterstaining with Trypan blue in a standard cell counter.

350

### 351 ***Animal models***

352 All animal procedures were performed in accordance with protocols approved by the Institutional  
353 Animal Care and Use Committee (IACUC) at Fred Hutchinson Cancer Center and the University  
354 of Washington. Animals were housed at a maximum of five per cage with 14-hour light/10-hour  
355 dark cycle with food and water *ad libitum*. Female 4-8 week-old NOD-SCID mice (NOD.Cg-  
356 Prkdcscid Il2rgtm1Wjl/SzJ, Jackson Labs; Bar Harbor, ME) were used for all experiments with

357 random assignment into treatment groups where applicable. Mice were monitored at least three  
358 times weekly for weight loss and other signs of neurologic or physical distress.

359

### 360 ***Patient-derived xenograft modeling***

361 Fresh surgically resected tumor sample was placed in sterile phosphate buffered saline and  
362 transported to Fred Hutchinson Cancer Center for further processing. Tumor specimen was  
363 dissociated with the use of a papain-based tumor dissociation kit (Miltenyi Biotec, 130-095-942)  
364 as per manufacturer's instructions. Intracranial orthotopic transplantation of single-cell suspension  
365 human glioblastoma tumor cells into murine mouse models were performed in standard, IACUC-  
366 approved fashion. Briefly, mice were induced with 5% isoflurane and maintained at 2% isoflurane  
367 in oxygen thereafter. After appropriate placement on a stereotactic frame (Stoelting Co.), the skull  
368 of the mouse was exposed through a small skin incision, and a small 1 mm<sup>2</sup> burrhole was placed  
369 shortly behind and lateral to bregma using a 25-gauge needle. Freshly-dissociated cells were  
370 suspended in 5 mL of PBS and loaded into a 33-gauge Hamilton needle syringe. The cells were  
371 then subsequently injected 2.0 mm lateral and posterior to bregma and 2 mm deep to the cortical  
372 surface. After completion of injection, the syringe was left *in situ* for another minute before  
373 removal in attempt to minimize risk of cell reflux. After scalp closure with suture, the mice were  
374 removed from anesthesia and allowed to recover on warming pads and returned to their cages  
375 following full recovery. Mice were then checked daily for five consecutive days for signs of  
376 distress or neurologic disability. Mice were also monitored using a small animal 1.5T MRI to track  
377 the degree of intracranial tumor, initially four weeks following injection and then again upon signs  
378 of neurologic symptoms, including ataxia, head tilt, seizures, or cachexia. Mice were sacrificed as  
379 soon as they demonstrated symptoms, and their brains were collected directly following  
380 euthanasia.

381

### 382 ***Radiation and TMZ treatment***

383 Tumor-bearing mice, as confirmed by small animal MRI, were given 50 mg/kg of temozolomide  
384 dissolved in 5% DMSO/saline or vehicle intraperitoneally for five consecutive days. On the same  
385 days, tumor-bearing mice were sedated with ketamine and xylazine and irradiated using a X-RAD  
386 320 from Precision X-Ray at 115 cGy/min as has been performed previously (40).

387

### 388 ***10x Chromium scRNA-seq & scATAC-seq***

389 Single-cell RNA sequencing was performed using the 10X Chromium v2 system. Library  
390 preparation was performed using 10x manufacturer instructions on an Illumina NovaSeq 6000.  
391 scATAC-seq was performed as per manufacturer instructions  
392 (SingleCell\_ATAC\_ReagentKits\_v1.1\_UserGuide\_RevD) and sequenced on an Illumina  
393 NovaSeq 6000.

394

395

396

397 ***Cell hashing and demultiplexing***

398 Single nuclei from each PDX condition were labeled with 1  $\mu$ l condition-specific hashtag  
399 oligonucleotide-labeled antibodies (BioLegend, TotalSeq A0541-A0545) according to  
400 manufacturer's protocol prior to pooling and loading on a single lane of the 10X Chromium v2  
401 system. The HTO library was processed separately and spiked in at 10% of the mRNA library  
402 prior to sequencing. Demultiplexing of pooled single-cell samples relies on subsequent HTO raw  
403 counts generated from scRNA-seq to classify computationally single-cells in their appropriate  
404 experimental condition. Demultiplexing was performed using the HTODemux function in the  
405 Seurat v3 platform (9). The result is single-cell annotation indicating the experimental condition  
406 in addition to the potential doublet or untagged state to which each tagged (or untagged) cell  
407 belongs.

408

409 ***Doublet prediction***

410 For those cells not processed using cell hashing (i.e., UW7 parental and UW7 recurrent autopsy  
411 cells), an alternative, computationally-based approach known as DoubletDecon was used to  
412 identify likely doublet samples (41). Briefly, DoubletDecon generates synthetic doublets by  
413 merging transcriptional profiles from randomly-selected pairs of cells belonging to distinct clusters  
414 identified in the dataset. These synthetic doublets are used, in conjunction with the previously  
415 identified clusters to create a deconvolution cell profile for the entire cell population. Pearson  
416 correlations are then calculated between each DCP and the centroid of each cluster. Those cells  
417 having the highest correlation to clusters comprised of synthetic doublets are labeled as doublets.  
418 Prior to final labeling of cells, a rescue step is performed in which certain cells may be rescued  
419 from the doublet labeling if the cell contains statistically significant upregulated expression,  
420 relative to a synthetic doublet cluster, for a minimum number of genes, that those cells are  
421 reincorporated into the non-doublet population. Finally, due to the random nature of synthetic  
422 doublet, it is likely that doublet predictions will vary run-to-run. Therefore, we conducted 50 runs  
423 to identify a consensus set of predicted doublets, which were subsequently excluded from  
424 downstream analysis.

425

426 ***Quality control and scRNA-seq data pre-processing***

427 We initially processed the 10X Genomics raw data using Cell Ranger Single-Cell Software Suite  
428 (release 3.1.0) to perform alignment, filtering, barcode counting, and UMI counting. Reads were  
429 aligned to the GRCh38 reference genome using the pre-built annotation package download from  
430 the 10X Genomics website. We then aggregated the outputs from different lanes using 'cellrange  
431 aggr' function with default parameter settings.

432

433 Each sample set analyzed via scRNA-seq (UW7 parental tumor, UW7 PDX samples, and UW7  
434 recurrent tumor collected at autopsy) was QC-filtered separately prior to data integration, as in the  
435 case of UW7 parental tumor and UW7 PDX samples, and/or subsequent downstream analysis.  
436 Each sample set consisted of the following: 5,082 cells with 27,763 mapped genes (UW7 parental

437 tumor), 11,648 cells with 26,231 mapped genes (UW7 PDX samples), and 690 cells with 19,917  
438 mapped genes (UW7 recurrent autopsy tumor). To minimize inclusion of poor-quality genes and  
439 single-cell samples per sample set, we applied the following QC filters: 1) mapped genes must be  
440 expressed at minimum count of 2 in at least 20 cells, 2) mitochondrial genes must comprise  $\leq 20\%$   
441 of the number of uniquely mapped genes/cell, 3) total counts/cell should be  $\geq 500$  and  $\leq 50,000$   
442 (UW7 primary tumor cells),  $\geq 500$  and  $\leq 24,000$  (UW7 PDX samples), or  $\geq 500$  and  $\leq 4,000$  (UW7  
443 recurrent autopsy tumor), and 4) the total number of mapped genes should be  $\geq 500$  genes and  $\leq$   
444 10,000 (UW7 primary tumor cells),  $\geq 500$  genes and  $\leq 7,000$  (UW7 PDX tumor cells), or  $\geq 500$   
445 genes and  $\leq 30,000$  (UW7 recurrent autopsy tumor). Post QC-filtering, each sample set consisted  
446 of the following: 4,456 primary tumor cells expressing up to 19,228 genes, 4,388 PDX tumor cells  
447 expressing up to 26,231 genes, and 350 recurrent tumor cells expressing up to 12,463 genes.

448

#### 449 ***Data normalization of scRNA-seq data***

450 We applied the SCTransform function, provided in the Seurat v3.2.2 platform, to normalize and  
451 variance-stabilize UMI counts in the single-cell data. This function develops a regularized negative  
452 binomial regression model to characterize the UMI count distribution on a gene-by-gene basis.  
453 This model is then used to determine Pearson residuals (i.e., the square-root of the variance-  
454 normalized difference between the actual gene count and model-predicted counts). These residuals  
455 represent the standardized expression values not affected by technical artifacts and are used for  
456 downstream analysis. Concomitantly, mitochondrial gene expression influence was regressed out  
457 of expression for each gene in each cell, as part of the SC-normalization procedure.

458

#### 459 ***Batch integration of scRNA-seq data***

460 To integrate the two different scRNA-seq datasets, we utilized the suite of integration functions  
461 provided by Seurat v3 platform – *FindTransferAnchors* and *IntegrateData*. These functions apply  
462 canonical correlation analysis (CCA) to identify shared patterns in gene expression profiles  
463 between datasets, (i.e., “integration anchors” that are pairs of cells that share maximal correlation  
464 with one another). These anchors are then used as references with which the remaining datasets  
465 are harmonized with one another. This technique enables information to be transferred across  
466 datasets including both continuous and categorical data. Consequently, categorical data like cell-  
467 type annotation or cluster membership can be transferred to multiple datasets that will be integrated  
468 together. We apply this method to transfer cell-type annotation from scRNA-seq data to  
469 corresponding scATAC-seq data (Fig. 1C).

470

#### 471 ***scRNA-seq cell-type and tumor cell annotation***

472 Established CNS cell-type-specific genes were used to determine gene set module scores for each  
473 cell. Gene module scores were determined using the *AddModuleScore* function provided in Seurat.  
474 In brief, the module score represents the difference between the mean expression of the gene set  
475 of interest and the average expression of a randomly selected set of control genes. To create a set  
476 of control genes, all genes are first grouped into 25 bins according to their respective average

477 expression. Next, for each gene in the gene set of interest, a corresponding set of 100 randomly  
478 selected genes is selected from the same expression bin. This results in a control set that is 100-  
479 fold larger in size, which is analogous to averaging over 100 randomly-selected gene-sets identical  
480 in size to the gene set of interest. Positive module scores indicate that the gene set of interest has  
481 higher expression than what is expected by random chance and vice versa. Final cell-type  
482 assignment was based on which corresponding gene set resulted in the highest positive module  
483 score above a threshold value of 0.1. To annotate tumor cells, inferCNV was used to infer the copy  
484 number variation state of each cell (Supplemental Text). Both cell-type and tumor cell state,  
485 defined by Chr7 gain and Chr10 loss, were used to determine final cell-type annotation for the  
486 primary and recurrent tumor biopsy samples (Figs. S1, S4).

487

#### 488 *scRNA-seq multivariate analysis*

489 Downstream analysis of scRNA-seq data was performed using Seurat v3.2.2. Following QC  
490 filtering, SC-normalization and integration, we performed principal component analysis (PCA) on  
491 the integrated gene expression matrix using the first 30 principal components for clustering and  
492 visualization. Next, we used the transformed gene expression data along the top 30 principal  
493 components (PC scores) to identify shared nearest neighbors (SNN). We then identified clusters  
494 in an unsupervised clustering using Leiden clustering using a resolution of 0.8. Visualization was  
495 performed using uniform manifold and projection (UMAP) using the scores values from the top  
496 30 principal components using a minimum distance of 0.2 and a spread value of 1.2.

497

#### 498 *Quality control and scATAC-seq data preprocessing*

499 Similar to scRNA-seq data, we initially processed 10X Genomics raw data using the Cell Ranger  
500 Software Suite (release 3.1.0). We performed additional data preprocessing and analysis using the  
501 software package ArchR (version 0.9.5). As part of the QC-filtering process, we used 2 metrics  
502 including: 1) number of unique nuclear fragments (>1000), and 2) signal-to-background ratio (i.e.,  
503 transcription start site (TSS) enrichment score > 4). This score represents a ratio of per-basepair  
504 accessibility centered around the TSS relative to flanking regions (2000 bp distal in either  
505 direction). Here, we used a TSS enrichment score value of 4 as a lower limit threshold. We also  
506 inspected fragment size distribution to verify whether a periodicity in fragment size, reflected as a  
507 multimodal distribution, existed. These peaks and valleys in the distribution occur because  
508 fragments span 0, 1, 2, etc. nucleosomes and the Tn5 enzyme cannot cut DNA that is tightly  
509 wrapped around a nucleosome. Moreover, we inferred and removed likely doublets from the  
510 datasets. Doublet inference in ArchR involves a method similar to the DoubletDecon in that  
511 heterotypic doublets are synthesized from the original population. These synthetic doublets are  
512 then added to the original population, which is projected into a 2D space via UMAP (42). Single-  
513 cells are then labeled as putative doublets if they repeatedly project as nearest neighbors during  
514 this iterative procedure.

515

516 We calculated QC statistics separately for each scATAC-seq data set (UW7 parental tumor and  
517 UW7 autopsy single-cell samples). The UW7 parental tumor set initially included 3,770 cells,  
518 having a median of 31,462 fragments/cell. In this case, applying QC-filtering resulted in 3,407  
519 cells having a median of 29,268 fragments/cell. The UW7 autopsy data set initially included 1,934  
520 single-cells, with a median of 8,801 fragments/cell. Following QC-filtering, 1,425 single-cells with  
521 a median of 8,033 fragments/cell remained (Fig. S9, S10).

522

### 523 **scATAC-seq dimensionality reduction**

524 Due to the sparse nature of scATAC-seq data, popular methods like PCA would result in high  
525 inter-cell similarity due to the predominance of non-values in the scATAC-seq profiles across the  
526 single-cell samples. Towards addressing the sparsity issue, latent semantic indexing (LSI), a  
527 technique applied in natural language processing to assess document similarity based on word  
528 counts, which often involves sparse and noisy datasets (many words, low frequency). Analogously,  
529 scATAC-seq profiles are viewed as a document and different accessible regions/peaks are words.  
530 To reduce the dimensionality of the scATAC-seq dataset, term frequency by depth normalization  
531 per cell is calculated. Next, these values are normalized by the inverse document frequency, which  
532 weights features by how often they occur. The result is a matrix that indicates how important a  
533 region/peak is to a sample. Using this resulting matrix, singular value decomposition (SVD) is  
534 applied to factorize the matrix into constituent matrices from which the most valuable information  
535 can be identified and projected into a lower dimensional space.

536

537 Here, ArchR applies a variation of this LSI methodology, an iterative LSI approach (43, 44). The  
538 default setting of two iterations was performed on both UW7 parental tumor and UW7 PDX  
539 scATAC-seq datasets.

540

### 541 **scATAC-seq cell-type and transcriptional program labeling**

542 Labeling of scATAC-seq datasets was performed using ArchR (package 22, v0.9.4). In brief,  
543 filtered fragments.tsv.gz files after quality control were used to generate an ArchR GeneScore  
544 matrix and a tiled genome feature matrix for each dataset. Cells were grouped by performing  
545 iterative latent semantic indexing (LSI) on the tile matrix, followed by the shared nearest neighbor  
546 clustering approach implemented in Seurat v3.2.2. GeneScore data, a correlate for gene expression,  
547 was then used to compare scATAC-seq clusters to a labeled reference scRNA-seq dataset, the  
548 UW7 parental tumor single-cell samples, using ArchR's implementation of the  
549 *FindTransferAnchors* method from Seurat. Cell-type and/or sample groups based on  
550 transcriptional network states with the highest score for each scATAC-seq cluster were used to  
551 annotate those cells for downstream analysis and display (Fig. 1C-1H).

552

### 553 **Motif deviation scores**

554 TF motif deviations were predicted on a per cell bases, relative to an aggregate background of a  
555 subpopulation of cells via chromVAR, which was incorporated into the broader ArchR package.

556 The enrichment of TF motifs can guide in the prediction of which regulatory factors are most  
557 active in a cell type of particular interest, such as tumor cells. Designed for predicting enrichment  
558 of TF activity on a per-cell basis from sparse chromatin accessibility data, chromVAR produces 2  
559 outputs including 1) deviation: a TN5 insertion sequence bias-corrected measurement of how far  
560 the per-cell accessibility of a given motif deviates from the expected accessibility based on the  
561 average of all cells or samples, and 2) z-score: referred to as a “deviation score” for each bias-  
562 corrected deviation across all cells. The absolute value of the deviation score is correlated with the  
563 per-cell read depth. With more reads, there is higher confidence that the difference in per-cell  
564 accessibility of the given motif from the expectation is greater than would occur by chance.

565

### 566 **Regulatory network analysis**

567 To infer regulons within single cells, we applied the SYGNAL (11) and MINER (12) workflow  
568 to the scRNA-seq data set resulting from the Batch Integration procedure described above. The  
569 MINER algorithm involves a suite of functions that enables the inference of causal mechanistic  
570 relationships linking genetic mutations to transcriptional regulation. Because our datasets did not  
571 include any extensive mutational profiling, we primarily focused on identifying regulons, based  
572 on co-expression clustering and enrichment of transcription factor binding motifs present in those  
573 co-expression clusters identified, and calculated the activity of these regulons in the single-cell  
574 samples. Regulon activity represents the eigengene value in each individual cell. Briefly, regulons  
575 identified in part by performing PCA on the normalized scRNA-seq data profiles in a gene-centric  
576 manner, i.e., PCA is used to identify principal components in which decreasing amounts of  
577 variation *across genes* is captured along each principal component – defined as a linear  
578 combination of samples in this approach. Here the coefficients, i.e., loadings, associated with each  
579 sample making up a principal component represent the eigengene value (45). Alternatively, one  
580 can view eigengene values as a scalar representation of expression of gene members for a regulon.

581

582 To determine the significance of each inferred regulon, we performed a permutation test to  
583 determine the possibility of obtaining an eigenvalue corresponding to the 1st principal component  
584 of a regulon (across all single-cells) of equal or greater value. The eigenvalue represents a  
585 summarizing value of all the genes in the regulon, i.e., eigengene and thus if these genes are indeed  
586 share coregulation or are correlated, the eigengene value would be higher than that of randomly  
587 selected set of genes. Next, we randomly select a set of genes having the same number of members  
588 as the original regulon and calculate the corresponding eigengene value for the permuted regulon.  
589 This procedure is repeated 1000 times to create a null distribution of eigengene values. We  
590 repeated this procedure for each inferred regulon. Those regulons whose eigengene values were  
591 greater than the 95th percentile of their respective null distribution were considered significant.  
592 Furthermore, we used eigenvalues to represent regulon “activity” within each cell.

593

594 Using the calculated activities of regulons, we identified groups of regulons sharing similar activity  
595 profiles across the cell population, i.e., transcriptional programs. Specifically, those regulons that

596 correlated across the cell population (k-means clustering of sample pairwise Pearson correlations)  
597 defined distinct transcriptional programs. We further defined subpopulations of single-cells based  
598 on their shared regulon/transcriptional program activity. Sample pair-wise Pearson correlations  
599 were calculated based on their regulon activity profiles.

600

### 601 ***Regulon enrichment analysis***

602 We used the geneset variance analysis GSVA (version 1.34.0, R package) (46) to determine  
603 enrichment scores of genesets. To confirm the significance of these enrichment scores, we  
604 performed permutation tests in which gene rankings were randomized in each single-cell sample  
605 and calculated the corresponding enrichment scores. In total, 1000 permutations were performed,  
606 from which the resulting scores were used to define empirically a null distribution of enrichment  
607 scores. We considered regulons having enrichment scores greater than the 95th percentile of the  
608 null distribution to be enriched in a particular cell.

609

### 610 ***Projection of UW7 recurrent tumor cells onto UW7 primary and PDX tumor cell UMAP 611 embeddings***

612 Before projecting any new data onto pre-existing data, we first determined a common set of gene  
613 features across the datasets, from which dimensionality reduction and data projection could be  
614 performed. We identified the common 6,541 genes across all the datasets. We then repeated PCA  
615 on the integrated UW7 data set using only the 6,541 common set of genes and used the transformed  
616 gene expression data along the top 30 principal components for visualization via UMAP. We then  
617 mean-centered and variance-normalized the UW7 autopsy tumor cell expression data using gene-  
618 specific means and variances calculated from the integrated dataset. These mean-centered and  
619 variance-normalized values were transformed via matrix multiplication with the eigenvectors from  
620 the top 30 principal components. We used the *predict* function in R along with the UMAP  
621 embeddings for the integrated data set to develop a linear regression model and the UW7 autopsy  
622 transformed data as predictors. Once the UW7 recurrent tumor sample UMAP embeddings were  
623 determined, we calculated pairwise Euclidean distances in the UMAP space amongst all tumor  
624 cell pairs between the UW7 autopsy and integrated datasets. Those cells having the lowest distance  
625 to the projected UW7 autopsy tumor cells are represented as arrowheads in Fig 2B.

626

### 627 ***Drug Matching Identification***

628 To identify drugs targeting elements within the transcriptional programs and states identified from  
629 the network analysis, we applied the Open Targets platform tool  
630 (<https://www.targetvalidation.org/>). The platform integrates a variety of data and evidence from  
631 genetics, genomics, transcriptomics, drug, animal models, and literature to score and rank target-  
632 disease associations for drug target identification. We focused our search on identifying drug-  
633 target matches for only those drugs associated with any cancer treatment employed in clinical trials  
634 stages phase I through IV.

635



636 **References.**

637

- 638 1. Q. T. Ostrom, H. Gittleman, P. Liao, T. Vecchione-Koval, Y. Wolinsky, C. Kruchko, J. S.  
639 Barnholtz-Sloan, CBTRUS Statistical Report: Primary brain and other central nervous  
640 system tumors diagnosed in the United States in 2010-2014. *Neuro. Oncol.* **19**, v1–v88  
641 (2017).
- 642 2. R. Stupp, M. E. Hegi, W. P. Mason, M. J. van den Bent, M. J. B. Taphoorn, R. C. Janzer,  
643 S. K. Ludwin, A. Allgeier, B. Fisher, K. Belanger, P. Hau, A. A. Brandes, J. Gijtenbeek,  
644 C. Marosi, C. J. Vecht, K. Mokhtari, P. Wesseling, S. Villa, E. Eisenhauer, T. Gorlia, M.  
645 Weller, D. Lacombe, J. G. Cairncross, R.-O. Mirimanoff, Effects of radiotherapy with  
646 concomitant and adjuvant temozolomide versus radiotherapy alone on survival in  
647 glioblastoma in a randomised phase III study: 5-year analysis of the EORTC-NCIC trial.  
648 *Lancet. Oncol.* **10**, 459–466 (2009).
- 649 3. R. Stupp, W. Mason, M. J. van den Bent, M. Weller, B. M. Fisher, M. J. B. Taphoorn, K.  
650 Belanger, A. A. Brandes, C. Marosi, U. Bogdahn, J. Curschmann, R. C. Janzer, S. K.  
651 Ludwin, T. Gorlia, A. Allgeier, D. Lacombe, G. Cairncross, E. Eisenhauer, R. O.  
652 Mirimanoff, Radiotherapy plus Concomitant and Adjuvant Temozolomide for  
653 Glioblastoma. *N. Engl. J. Med.* (2005), doi:10.1056/NEJMoa043330.
- 654 4. C. Neftel, J. Laffy, M. G. Filbin, T. Hara, M. E. Shore, G. J. Rahme, A. R. Richman, D.  
655 Silverbush, M. L. Shaw, C. M. Hebert, J. Dewitt, S. Gritsch, E. M. Perez, L. N. G. Castro,  
656 X. Lan, N. Druck, C. Rodman, D. Dionne, A. Kaplan, M. S. Bertalan, J. Small, K. Pelton,  
657 S. Becker, D. Bonal, Q.-D. Nguyen, R. L. Servis, J. M. Fung, R. Mylvaganam, L. Mayr, J.  
658 Gojo, C. Haberler, R. Geyeregger, T. Czech, I. Slavc, B. V Nahed, W. T. Curry, B. S.  
659 Carter, H. Wakimoto, P. K. Brastianos, T. T. Batchelor, A. Stemmer-Rachamimov, M.  
660 Martinez-Lage, M. P. Frosch, I. Stamenkovic, N. Riggi, E. Rheinbay, M. Monje, O.  
661 Rozenblatt-Rosen, D. P. Cahill, A. P. Patel, T. Hunter, I. M. Verma, K. L. Ligon, D. N.  
662 Louis, A. Regev, B. E. Bernstein, I. Tirosh, M. L. Suvà, An Integrative Model of Cellular  
663 States, Plasticity, and Genetics for Glioblastoma. *Cell* (2019),  
664 doi:<https://doi.org/10.1016/j.cell.2019.06.024>.
- 665 5. A. P. Patel, I. Tirosh, J. J. Trombetta, A. K. Shalek, S. M. Gillespie, H. Wakimoto, D. P.  
666 Cahill, B. V. Nahed, W. T. Curry, R. L. Martuza, D. N. Louis, O. Rozenblatt-Rosen, M. L.  
667 Suva, A. Regev, B. E. Bernstein, Single-cell RNA-seq highlights intratumoral  
668 heterogeneity in primary glioblastoma. *Science* (80-. ). **344**, 1396–1401 (2014).
- 669 6. J. Cao, J. S. Packer, V. Ramani, D. A. Cusanovich, C. Huynh, R. Daza, X. Qiu, C. Lee, S.  
670 N. Furlan, F. J. Steemers, A. Adey, R. H. Waterston, C. Trapnell, J. Shendure,  
671 Comprehensive single-cell transcriptional profiling of a multicellular organism. *Science*  
672 (80-. ). **357**, 661–667 (2017).
- 673 7. J. A. Griffiths, A. Scialdone, J. C. Marioni, Using single-cell genomics to understand  
674 developmental processes and cell fate decisions. *Mol. Syst. Biol.* **14**, e8046 (2018).
- 675 8. E. Z. Macosko, A. Basu, R. Satija, J. Nemesk, K. Shekhar, M. Goldman, I. Tirosh, A. R.  
676 Bialas, N. Kamitaki, E. M. Martersteck, J. J. Trombetta, D. A. Weitz, J. R. Sanes, A. K.  
677 Shalek, A. Regev, S. A. McCarroll, Highly Parallel Genome-wide Expression Profiling of  
678 Individual Cells Using Nanoliter Droplets. *Cell.* **161**, 1202–1214 (2015).

- 679 9. T. Stuart, A. Butler, P. Hoffman, C. Hafemeister, E. Papalexi, W. M. Mauck, Y. Hao, M.  
680 Stoeckius, P. Smibert, R. Satija, Comprehensive Integration of Single-Cell Data. *Cell*.  
681 **177**, 1888-1902.e21 (2019).
- 682 10. D. Stichel, A. Ebrahimi, D. Reuss, D. Schrimpf, T. Ono, M. Shirahata, G. Reifengerger,  
683 M. Weller, D. Hänggi, W. Wick, C. Herold-Mende, M. Westphal, S. Brandner, S. M.  
684 Pfister, D. Capper, F. Sahm, A. von Deimling, Distribution of EGFR amplification,  
685 combined chromosome 7 gain and chromosome 10 loss, and TERT promoter mutation in  
686 brain tumors and their potential for the reclassification of IDHwt astrocytoma to  
687 glioblastoma. *Acta Neuropathol.* **136**, 793–803 (2018).
- 688 11. C. L. Plaisier, S. O’Brien, B. Bernard, S. Reynolds, Z. Simon, C. M. Toledo, Y. Ding, D.  
689 J. Reiss, P. J. Paddison, N. S. Baliga, Causal Mechanistic Regulatory Network for  
690 Glioblastoma Deciphered Using Systems Genetics Network Analysis. *Cell Syst.* **3**, 172–  
691 186 (2016).
- 692 12. M. A. Wall, S. Turkarslan, W.-J. Wu, S. A. Danziger, D. J. Reiss, M. J. Mason, A. P.  
693 Dervan, M. W. B. Trotter, D. Bassett, R. M. Hershberg, A. L. G. de Lomana, A. V  
694 Ratushny, N. S. Baliga, Genetic program activity delineates risk, relapse, and therapy  
695 responsiveness in Multiple Myeloma. *bioRxiv* (2020), doi:10.1101/2020.04.01.012351.
- 696 13. G. Yu, L.-G. Wang, Y. Han, Q.-Y. He, clusterProfiler: an R Package for Comparing  
697 Biological Themes Among Gene Clusters. *Omi. A J. Integr. Biol.* **16**, 284–287 (2012).
- 698 14. I. Tirosh, A. S. Venteicher, C. Hebert, L. E. Escalante, A. P. Patel, K. Yizhak, J. M.  
699 Fisher, C. Rodman, C. Mount, M. G. Filbin, C. Neftel, N. Desai, J. Nyman, B. Izar, C. C.  
700 Luo, J. M. Francis, A. A. Patel, M. L. Onozato, N. Riggi, K. J. Livak, D. Gennert, R.  
701 Satija, B. V. Nahed, W. T. Curry, R. L. Martuza, R. Mylvaganam, A. J. Iafrate, M. P.  
702 Frosch, T. R. Golub, M. N. Rivera, G. Getz, O. Rozenblatt-Rosen, D. P. Cahill, M. Monje,  
703 B. E. Bernstein, D. N. Louis, A. Regev, M. L. Suvà, Single-cell RNA-seq supports a  
704 developmental hierarchy in human oligodendroglioma. *Nature.* **539**, 309–313 (2016).
- 705 15. R. Tejero, Y. Huang, I. Katsyv, M. Kluge, J.-Y. Lin, J. Tome-Garcia, N. Daviaud, Y.  
706 Wang, B. Zhang, N. M. Tsankova, C. C. Friedel, H. Zou, R. H. Friedel, Gene signatures of  
707 quiescent glioblastoma cells reveal mesenchymal shift and interactions with niche  
708 microenvironment. *EBioMedicine.* **42**, 252–269 (2019).
- 709 16. H. S. Phillips, S. Kharbanda, R. Chen, W. F. Forrest, R. H. Soriano, T. D. Wu, A. Misra,  
710 J. M. Nigro, H. Colman, L. Soroceanu, P. M. Williams, Z. Modrusan, B. G. Feuerstein, K.  
711 Aldape, Molecular subclasses of high-grade glioma predict prognosis, delineate a pattern  
712 of disease progression, and resemble stages in neurogenesis. *Cancer Cell.* **9**, 157–173  
713 (2006).
- 714 17. C. M. Toledo, Y. Ding, P. Hoellerbauer, R. J. Davis, R. Basom, E. J. Girard, E. Lee, P.  
715 Corrin, T. Hart, H. Bolouri, J. Davison, Q. Zhang, J. Hardcastle, B. J. Aronow, C. L.  
716 Plaisier, N. S. Baliga, J. Moffat, Q. Lin, X. N. Li, D. H. Nam, J. Lee, S. M. Pollard, J.  
717 Zhu, J. J. Delrow, B. E. Clurman, J. M. Olson, P. J. Paddison, Genome-wide CRISPR-  
718 Cas9 Screens Reveal Loss of Redundancy between PKMYT1 and WEE1 in Glioblastoma  
719 Stem-like Cells. *Cell Rep.* **13**, 2425–2439 (2015).
- 720 18. J. M. Granja, M. R. Corces, S. E. Pierce, S. T. Bagdatli, H. Choudhry, H. Y. Chang, W. J.  
721 Greenleaf, ArchR: An integrative and scalable software package for single-cell chromatin

- 722 accessibility analysis. *bioRxiv* (2020), doi:10.1101/2020.04.28.066498.
- 723 19. A. N. Schep, B. Wu, J. D. Buenrostro, W. J. Greenleaf, chromVAR: inferring  
724 transcription-factor-associated accessibility from single-cell epigenomic data. *Nat.*  
725 *Methods*. **14**, 975–978 (2017).
- 726 20. H. Zhang, D. Geng, J. Gao, Y. Qi, Y. Shi, Y. Wang, Y. Jiang, Y. Zhang, J. Fu, Y. Dong,  
727 S. Gao, R. Yu, X. Zhou, Expression and significance of Hippo/YAP signaling in glioma  
728 progression. *Tumour Biol. J. Int. Soc. Oncodevelopmental Biol. Med.* (2016),  
729 doi:10.1007/s13277-016-5318-1.
- 730 21. J. K. Holden, C. N. Cunningham, Targeting the Hippo Pathway and Cancer through the  
731 TEAD Family of Transcription Factors. *Cancers (Basel)*. **10** (2018),  
732 doi:10.3390/cancers10030081.
- 733 22. P. Sievers, J. Chiang, D. Schrimpf, D. Stichel, N. Paramasivam, M. Sill, T. Gayden, B.  
734 Casalini, D. E. Reuss, J. Dalton, K. W. Pajtler, D. Hänggi, C. Herold-Mende, E. Rushing,  
735 A. Korshunov, C. Mawrin, M. Weller, M. Schlesner, W. Wick, N. Jabado, D. T. W. Jones,  
736 S. M. Pfister, A. von Deimling, D. W. Ellison, F. Sahm, YAP1-fusions in pediatric NF2-  
737 wildtype meningioma. *Acta Neuropathol*. **139** (2020), pp. 215–218.
- 738 23. K. W. Pajtler, Y. Wei, K. Okonechnikov, P. B. G. Silva, M. Vouri, L. Zhang, S. Brabetz,  
739 L. Sieber, M. Gulley, M. Mauermann, T. Wedig, N. Mack, Y. Imamura Kawasawa, T.  
740 Sharma, M. Zuckermann, F. Andreiuolo, E. Holland, K. Maass, H. Körkel-Qu, H.-K. Liu,  
741 F. Sahm, D. Capper, J. Bunt, L. J. Richards, D. T. W. Jones, A. Korshunov, L. Chavez, P.  
742 Lichter, M. Hoshino, S. M. Pfister, M. Kool, W. Li, D. Kawauchi, YAP1 subgroup  
743 supratentorial ependymoma requires TEAD and nuclear factor I-mediated transcriptional  
744 programmes for tumorigenesis. *Nat. Commun*. **10**, 3914 (2019).
- 745 24. J. Zhang, K. Huang, Z. Shi, J. Zou, Y. Wang, Z. Jia, A. Zhang, L. Han, X. Yue, N. Liu, T.  
746 Jiang, Y. You, P. Pu, C. Kang, High  $\beta$ -catenin/Tcf-4 activity confers glioma progression  
747 via direct regulation of AKT2 gene expression. *Neuro. Oncol*. **13**, 600–609 (2011).
- 748 25. P. Lindner, S. Paul, M. Eckstein, C. Hampel, J. K. Muenzner, K. Erlenbach-Wuensch, H.  
749 P. Ahmed, V. Mahadevan, T. Brabetz, A. Hartmann, J. Vera, R. Schneider-Stock, EMT  
750 transcription factor ZEB1 alters the epigenetic landscape of colorectal cancer cells. *Cell*  
751 *Death Dis*. **11**, 147 (2020).
- 752 26. S. Drápela, J. Bouchal, M. K. Jolly, Z. Culig, K. Souček, ZEB1: A Critical Regulator of  
753 Cell Plasticity, DNA Damage Response, and Therapy Resistance. *Front. Mol. Biosci*. **7**,  
754 36 (2020).
- 755 27. N. Zalcman, T. Canello, H. Ovadia, H. Charbit, B. Zelikovitch, A. Mordechai, Y. Fellig,  
756 S. Rabani, T. Shahar, A. Lossos, I. Lavon, Androgen receptor: a potential therapeutic  
757 target for glioblastoma. *Oncotarget*. **9**, 19980–19993 (2018).
- 758 28. K.-F. Chang, X.-F. Huang, J. T. Chang, Y.-C. Huang, J.-C. Weng, N.-M. Tsai, Cedrol  
759 suppresses glioblastoma progression by triggering DNA damage and blocking nuclear  
760 translocation of the androgen receptor. *Cancer Lett*. **495**, 180–190 (2020).
- 761 29. A. Butler, P. Hoffman, P. Smibert, E. Papalexi, R. Satija, Integrating single-cell  
762 transcriptomic data across different conditions, technologies, and species. *Nat. Biotechnol*.  
763 **36**, 411–420 (2018).

- 764 30. D. Ochoa, A. Hercules, M. Carmona, D. Suveges, A. Gonzalez-Uriarte, C. Malangone, A.  
765 Miranda, L. Fumis, D. Carvalho-Silva, M. Spitzer, J. Baker, J. Ferrer, A. Raies, O.  
766 Razuvayevskaya, A. Faulconbridge, E. Petsalaki, P. Mutowo, S. Machlitt-Northen, G.  
767 Peat, E. McAuley, C. K. Ong, E. Mountjoy, M. Ghossaini, A. Pierleoni, E. Papa, M.  
768 Pignatelli, G. Koscielny, M. Karim, J. Schwartzenruber, D. G. Hulcoop, I. Dunham, E.  
769 M. McDonagh, Open Targets Platform: supporting systematic drug–target identification  
770 and prioritisation. *Nucleic Acids Res.* (2020), doi:10.1093/nar/gkaa1027.
- 771 31. H. Fazilaty, L. Rago, K. Kass Youssef, O. H. Ocaña, F. Garcia-Asencio, A. Arcas, J.  
772 Galceran, M. A. Nieto, A gene regulatory network to control EMT programs in  
773 development and disease. *Nat. Commun.* **10**, 5115 (2019).
- 774 32. Z. Zhang, L. Zhou, N. Xie, E. C. Nice, T. Zhang, Y. Cui, C. Huang, Overcoming cancer  
775 therapeutic bottleneck by drug repurposing. *Signal Transduct. Target. Ther.* **5**, 113 (2020).
- 776 33. T. Inoue, M. Ota, M. Ogawa, K. Mikoshiba, J. Aruga, Zic1 and Zic3 Regulate Medial  
777 Forebrain Development through Expansion of Neuronal Progenitors. *J. Neurosci.* **27**,  
778 5461–5473 (2007).
- 779 34. X.-H. Pei, X.-Q. Lv, H.-X. Li, Sox5 induces epithelial to mesenchymal transition by  
780 transactivation of Twist1. *Biochem. Biophys. Res. Commun.* **446**, 322–327 (2014).
- 781 35. J. Hu, J. Tian, S. Zhu, L. Sun, J. Yu, H. Tian, Q. Dong, Q. Luo, N. Jiang, Y. Niu, Z.  
782 Shang, Sox5 contributes to prostate cancer metastasis and is a master regulator of TGF- $\beta$ -  
783 induced epithelial mesenchymal transition through controlling Twist1 expression. *Br. J.*  
784 *Cancer.* **118**, 88–97 (2018).
- 785 36. M. Chen, S. Zou, C. He, J. Zhou, S. Li, M. Shen, R. Cheng, D. Wang, T. Zou, X. Yan, Y.  
786 Huang, J. Shen, Transactivation of SOX5 by Brachyury promotes breast cancer bone  
787 metastasis. *Carcinogenesis.* **41**, 551–560 (2020).
- 788 37. K. L. Thu, J. Silvester, M. J. Elliott, W. Ba-alawi, M. H. Duncan, A. C. Elia, A. S. Mer, P.  
789 Smirnov, Z. Safikhani, B. Haibe-Kains, T. W. Mak, D. W. Cescon, Disruption of the  
790 anaphase-promoting complex confers resistance to TTK inhibitors in triple-negative breast  
791 cancer. *Proc. Natl. Acad. Sci.* **115**, E1570–E1577 (2018).
- 792 38. C. K. Werner, U. J. Nna, H. Sun, K. Wilder-Romans, J. Dresser, A. U. Kothari, W. Zhou,  
793 Y. Yao, A. Rao, S. Stallard, C. Koschmann, T. Bor, W. Debinski, A. M. Hegedus, M. A.  
794 Morgan, S. Venneti, E. Baskin-Bey, D. E. Spratt, H. Colman, J. N. Sarkaria, A. M.  
795 Chinnaiyan, J. R. Eisner, C. Speers, T. S. Lawrence, R. E. Strowd, D. R. Wahl, Expression  
796 of the Androgen Receptor Governs Radiation Resistance in a Subset of Glioblastomas  
797 Vulnerable to Antiandrogen Therapy. *Mol. Cancer Ther.* **19**, 2163–2174 (2020).
- 798 39. M. R. Sarkisian, S. L. Semple-Rowland, Emerging Roles of Primary Cilia in Glioma.  
799 *Front. Cell. Neurosci.* **13**, 55 (2019).
- 800 40. M. Squatrito, C. W. Brennan, K. Helmy, J. T. Huse, J. H. Petrini, E. C. Holland, Loss of  
801 ATM/Chk2/p53 Pathway Components Accelerates Tumor Development and Contributes  
802 to Radiation Resistance in Gliomas. *Cancer Cell.* **18**, 619–629 (2010).
- 803 41. E. A. K. DePasquale, D. J. Schnell, P.-J. Van Camp, Í. Valiente-Alandí, B. C. Blaxall, H.  
804 L. Grimes, H. Singh, N. Salomonis, DoubletDecon: Deconvoluting Doublets from Single-  
805 Cell RNA-Sequencing Data. *Cell Rep.* **29**, 1718–1727.e8 (2019).

- 806 42. E. Becht, L. McInnes, J. Healy, C.-A. Dutertre, I. W. H. Kwok, L. G. Ng, F. Ginhoux, E.  
807 W. Newell, Dimensionality reduction for visualizing single-cell data using UMAP. *Nat.*  
808 *Biotechnol.* **37**, 38–44 (2019).
- 809 43. A. T. Satpathy, J. M. Granja, K. E. Yost, Y. Qi, F. Meschi, G. P. McDermott, B. N. Olsen,  
810 M. R. Mumbach, S. E. Pierce, M. R. Corces, P. Shah, J. C. Bell, D. Jhutti, C. M. Nemece,  
811 J. Wang, L. Wang, Y. Yin, P. G. Giresi, A. L. S. Chang, G. X. Y. Zheng, W. J. Greenleaf,  
812 H. Y. Chang, Massively parallel single-cell chromatin landscapes of human immune cell  
813 development and intratumoral T cell exhaustion. *Nat. Biotechnol.* **37**, 925–936 (2019).
- 814 44. J. M. Granja, S. Klemm, L. M. McGinnis, A. S. Kathiria, A. Mezger, M. R. Corces, B.  
815 Parks, E. Gars, M. Liedtke, G. X. Y. Zheng, H. Y. Chang, R. Majeti, W. J. Greenleaf,  
816 Single-cell multiomic analysis identifies regulatory programs in mixed-phenotype acute  
817 leukemia. *Nat. Biotechnol.* **37**, 1458–1465 (2019).
- 818 45. P. Langfelder, S. Horvath, Eigengene networks for studying the relationships between co-  
819 expression modules. *BMC Syst. Biol.* **1**, 54 (2007).
- 820 46. S. Hänzelmann, R. Castelo, J. Guinney, GSVA: gene set variation analysis for microarray  
821 and RNA-Seq data. *BMC Bioinformatics.* **14**, 7 (2013).
- 822 47. T. Tickle, I. Tirosh, C. Georgescu, M. Brown, B. Haas, inferCNV of the Trinity CTAT  
823 Project. (2019), (available at <https://github.com/broadinstitute/inferCNV>).
- 824

825 **Acknowledgments:** We thank the University of Washington Brain Tumor Bank for collection  
826 and acquisition of freshly resected tumor samples as well as the patient UW7 and family for their  
827 generosity.

828  
829 **Funding:** This work was supported by a Burroughs Wellcome Career Award for Medical  
830 Scientists (A.P.P.), Discovery Grant from the Kuni Foundation (A.P.P.), Institute for Systems  
831 Biology funding (N.B.), R01AI141953 (N.B.), NSF1565166 (N.B.), Washington Research  
832 Foundation Funding (N.B.), F32 CA247445-01 funding (J.P.), NIH/NINDS R25NS079200  
833 (S.N.E.), and the University of Washington Ojemann Family Neurosurgery Research Fund  
834 (A.H.F.).

835 **Author contributions:** S.N.E., A.M., A.H.F., and A.P.P. conceived the project and designed  
836 experiments. S.E. and A.M. developed the PDX mouse modeling system. A.P.P., C.D.K., and  
837 P.J.K. provided and curated the patient-derived primary, biopsy, and autopsy tumor specimen.  
838 A.H.F., S.N.E., and A.B.M. performed *in vitro* and *in vivo* experiments. J.P., A.L., K.K., W.W.,  
839 S.T., N.S.B., and A.P.P. performed and/or contributed to data analysis. J.P., A.H.F., N.S.B., and  
840 A.P.P. drafted and edited the manuscript with input from all authors.

841  
842 **Competing interests:** The authors have no financial or business interests to disclose.

843  
844 **Data and materials availability:** Data to be submitted in GEO.

845  
846  
847 **List of Supplementary Materials:**

848  
849 **Figure S1.** Tumor cell annotation in primary tumor biopsy.

850  
851 **Figure S2.** Enrichment of experimental conditions within shared-nearest-neighbors (SNN)  
852 clusters of primary and PDX tumor cells.

853  
854 **Figure S3.** Primary tumor cells and PDX tumor cell nearest neighbors.

855  
856 **Figure S4.** Tumor cell annotation of recurrent tumor biopsy.

857  
858 **Figure S5.** Projection of UW7 recurrent autopsy tumor-cell samples into lower dimensional space  
859 defined by primary and PDX tumor cells.

860  
861 **Figure S6.** Cosine similarity of recurrent tumor cells to LPT-B and recurrent cell groups with  
862 respect to transcriptional program 2 activity.

863  
864 **Figure S7.** Enrichment of experimental conditions within timepoint partitioned clusters.

865  
866 **Figure S8.** AR-regulated regulon activity across partitioned clusters.

867

868 **Figure S9.** Quality control & doublet identification for scATAC-seq profiles from primary tumor  
869 biopsy.

870

871 **Figure S10.** Quality control & doublet identification for scATAC-seq profiles from recurrent  
872 tumor biopsy.

873

874 **Table S1.** Cell type marker differential expression analysis. See attached.

875

876 **Table S2.** Regulons. See attached.

877

878 **Table S3.** FIRM analysis/miRNAs. See attached.

879

880 **Table S4.** Functional enrichment in transcriptional program 1. See attached.

881

882 **Table S5.** Functional enrichment in transcriptional program 2. See attached.

883

884 **Table S6.** Functional enrichment in transcriptional program 3. See attached.

885

886 **Table S7.** Functional enrichment in transcriptional program 4. See attached.

887

888 **Table S8.** Functional enrichment in transcriptional program 5. See attached.

889

890 **Table S9.** Breakdown and enrichment of proliferating cells in sample groups. See attached.

891

892 **Table S10.** Comparison of regulon TFs and CRISPR-Cas9 knockout screen of 1,445 TFs that  
893 overlap with GBM SYGNAL network. See attached.

894

895 **Table S11.** Differential expression analysis of ArchR-MINER TFs. See attached.

896

897 **Table S12.** Open Targets results. See attached.

898

899 **Table S13.** Significantly upregulated activity of regulons in timeframe groupings. See attached.

900

901 **Figures**  
902

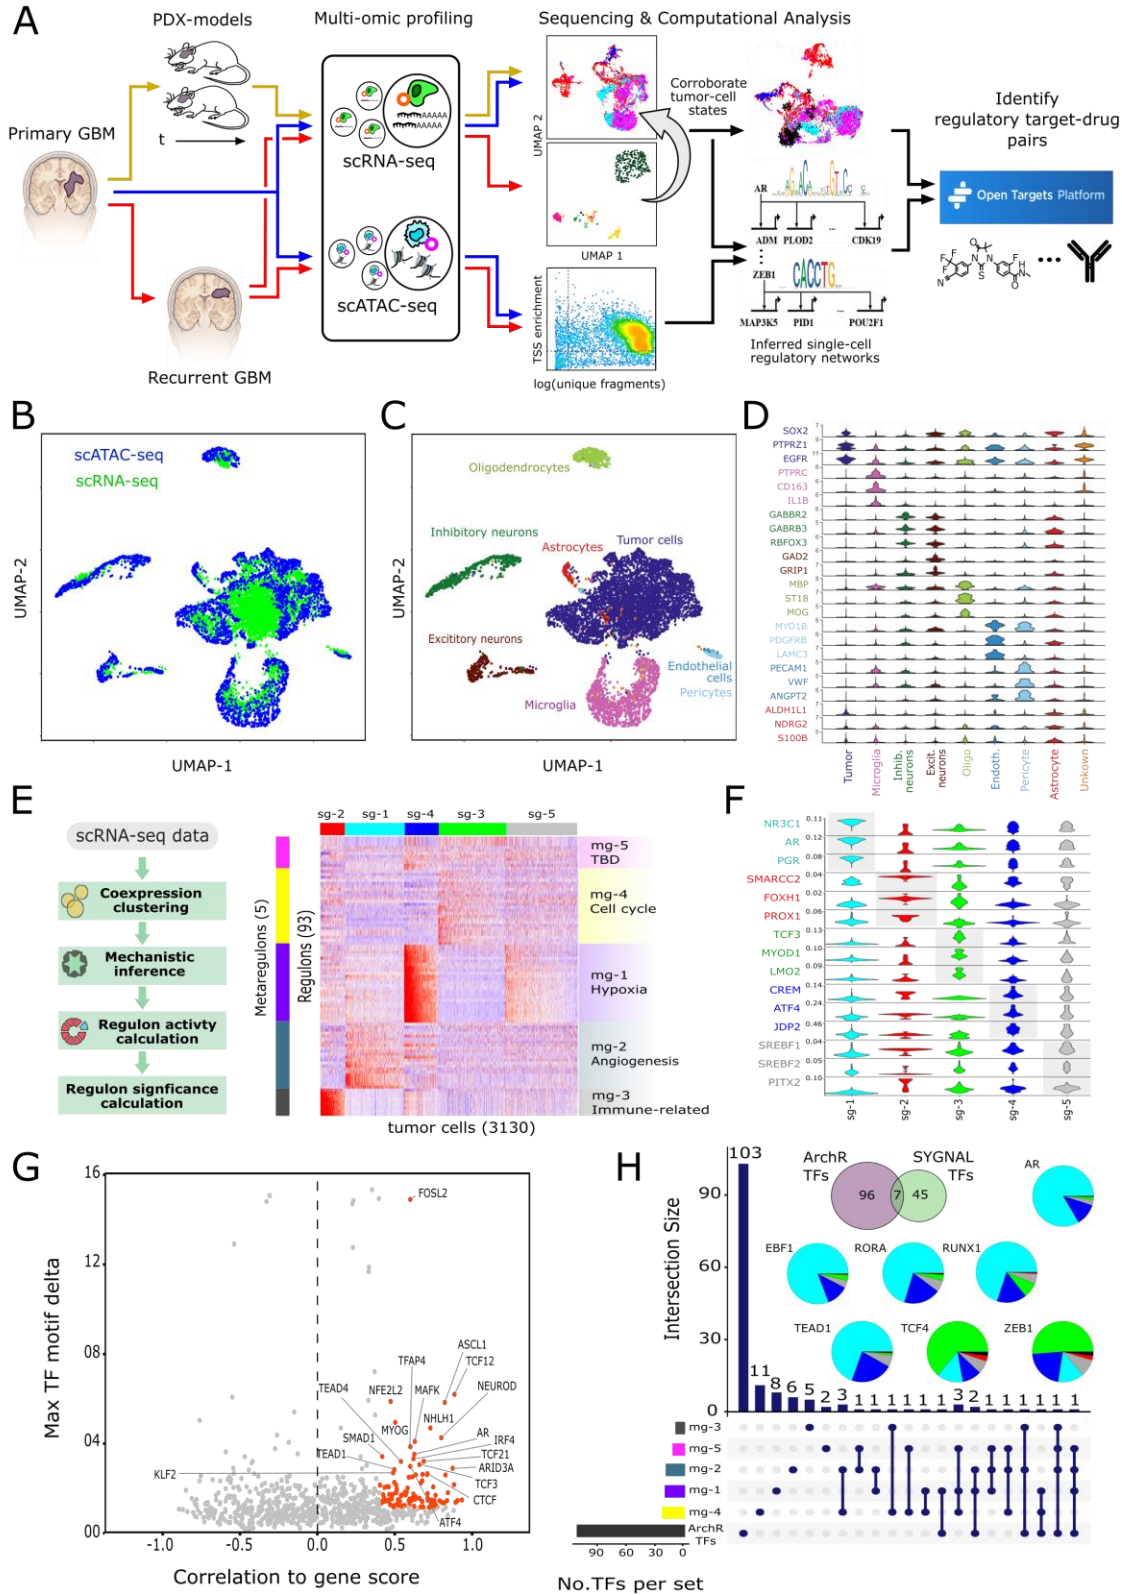



904

905 **Figure 1. Multi-modal single-cell characterization of UW7 primary tumor biopsy. (A)**  
906 Schema of overall proof-of-concept modeling and analytical framework used to characterize  
907 intratumoral heterogeneity using multi-omic, single-cell level analysis and drive precision care for  
908 individual GBM patient. **(B)** UMAP plots of integrated scATAC-seq and scRNA-seq profiles. **(C)**  
909 Cell-type annotation of integrated single-cell data based on established cell-type-specific gee sets.  
910 **(D)** Violin plots of cell-type marker gene expression ( $\log_2[\text{normalized counts} + 1]$ ). **(E)**  
911 scSYGNAL/MINER analysis of scRNA-seq profile of cells from UW7 primary tumor biopsy.  
912 Heatmap indicates activity (z-scores) of co-regulated gene modules, (i.e., regulons [rows] across  
913 cells [columns]). Groups of regulons sharing similar activity patterns across cells define  
914 transcriptional programs (mg-X), each enriched with specific biological functions. Groups of cells  
915 sharing similar activity profiles across regulons define transcriptional network states (sg-X). **(F)**  
916 Violin plots showing distribution of standardized deviation accessibility scores (deviation scores)  
917 of top three TF binding motifs per scATAC-seq sample. **(G)** Scatter plot showing positive TF  
918 regulators (orange dots) per scATAC-seq profiles. Positive TF regulators have deviation scores  
919 that correlate with their corresponding inferred gene expression (gene score) values (correlation  $\geq$   
920 0.4, FDR-adjusted p-value  $\leq$  0.1) and have a maximum inter-sample group deviation score  
921 difference in the upper 50% quantile. The top 20 TFs having maximal radial distance from the  
922 origin are labeled for reference. **(H)** Upset plot delineates the number of TFs identified in single-  
923 cell samples via scSYGNAL and ArchR analysis and the number of shared TFs across all  
924 combinations of TF sets associated with transcriptional program-based groups and ArchR TF sets.  
925 SYGNAL/MINER analysis of scRNA-seq profiles and ArchR analysis of scATAC-seq profiles  
926 identified 52 and 103 “active” TFs, respectively, and resulted in seven consensus TFs. Pie charts  
927 indicate the composition of single cells from each transcriptional network state associated with a  
928 positive deviation score for each of the consensus TFs.

929

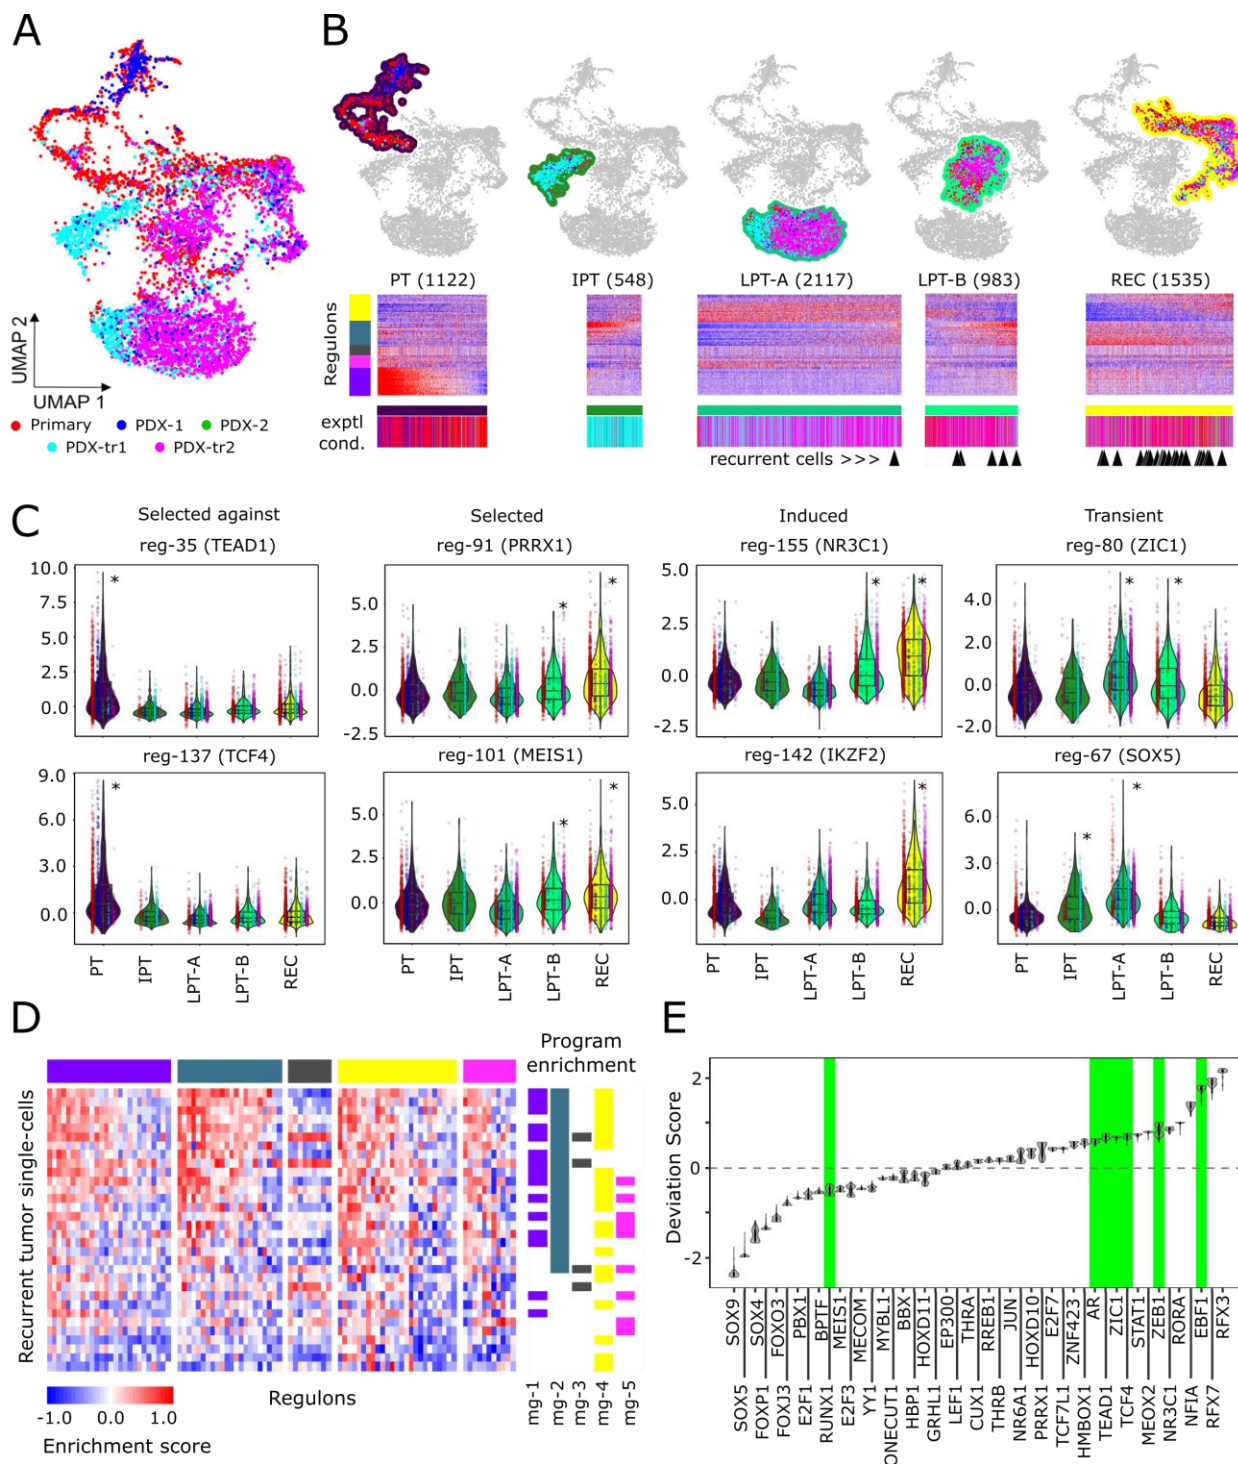

930

931

932 **Figure 2. Modeling tumor progression and tumor response to standard of care. (A)** UMAP  
 933 plot of integrated scRNA-seq profiles of tumor cells from UW7 primary tumor and corresponding  
 934 PDX mice models. Colors indicate experimental conditions (Primary tumor = tumor biopsy, PDX-  
 935 1/2 = untreated samples collected at 24 hrs and 72 hrs post completion of corresponding TMZ/XRT

936 treatment, PDX-tr1/tr2 = samples collected 24 hrs and 72hrs, respectively, post TMZ/XRT  
937 treatment). **(B)** Five subpopulations of tumor cells enriched for various experimental conditions  
938 (PT = pretreatment, IPT = immediate post-treatment, LPT-A = late post-treatment A, LPT-B = late  
939 post-treatment B, REC = recurrent). Heatmaps underneath each subpopulation show regulon  
940 activity z-scores across single-cell samples for each subpopulation. Color bars underneath each  
941 heatmap indicate the experimental condition of each cell as in A. Black arrowheads indicate which  
942 tumor cell sample the recurrent tumor cells collected at autopsy mapped closest to in the alternative  
943 UMAP embedding plot (Fig. S5). **(C)** Violin plots of regulon activity within each subpopulation.  
944 Select examples of regulons exhibiting distinct dynamic behavior, (i.e., “selected-against”,  
945 “selected”, “induced”, and “transient” behavior) are included. Inline points represent regulon  
946 activity levels within cells from each experimental condition within each subpopulation. Asterisks  
947 indicate which subpopulations had significantly higher regulon activity relative to the rest of the  
948 primary/PDX tumor-cell population (FDR-adjusted  $p$  value  $< 0.05$ ). **(D)** Gene set enrichment  
949 analysis of regulon gene sets in recurrent tumor cell scRNA-seq profiles. Top color bar indicates  
950 transcriptional programs (Fig. 1D). Right adjacent color bars indicate samples statistically enriched  
951 with regulons for a particular transcriptional program (FDR-adjusted  $p$ -values  $\leq 0.1$ ). **(E)** Violin  
952 plots showing deviation scores across recurrent tumor scATAC-seq profiles. Green background  
953 highlights the 7 consensus TFs previously identified (Fig. 1H).

954

955

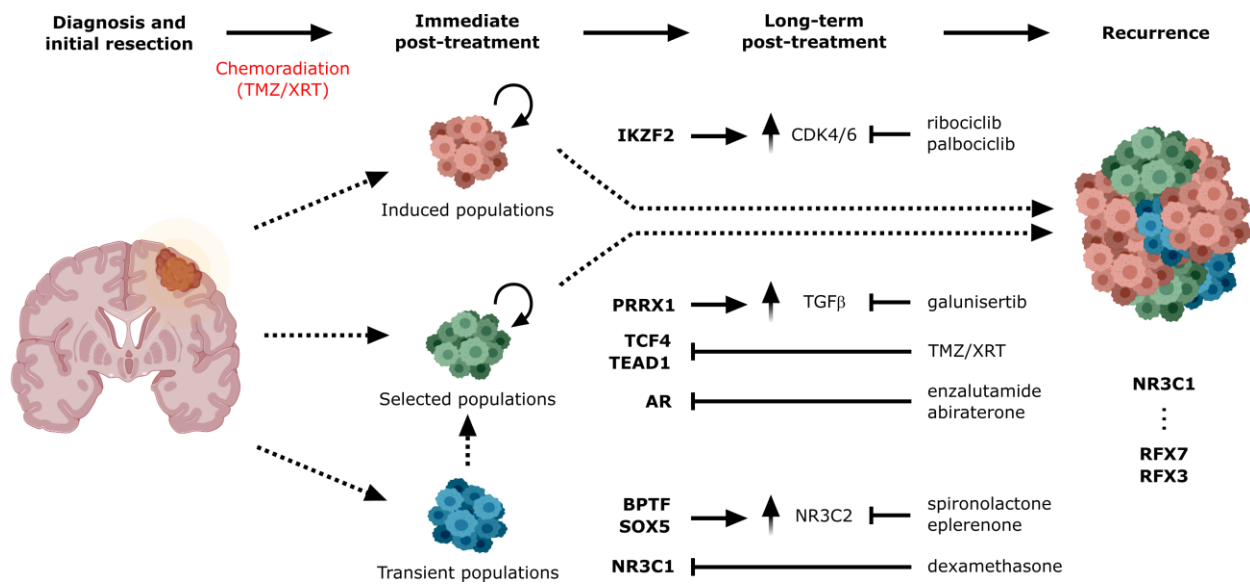

956

957

958 **Figure 3. Comprehensive schematic of glioblastoma progression.** Distinct populations of  
959 induced, selected, and transient tumor cells states, regulons, and TFs (bold) contribute to  
960 intratumoral heterogeneity that plays a role in treatment resistance. As cell states may be  
961 differentially susceptible to treatment and may be selected for or induced by therapeutic  
962 intervention, use of a more complete view of cell state trajectories with scSYGNAL and MINER  
963 analysis may allow for the prediction of therapies that work in either the concurrent setting against  
964 cell states or an adjuvant/neo-adjuvant setting against induced cell states.
